# Supplementary material for: Dipeptidyl peptidase 4 promotes peritoneal fibrosis and its inhibitions prevent failure of peritoneal dialysis
Source: PubMed Central journal article supplement (PMC7846859; doi:10.1038/s42003-021-01652-x), 2021-01-29
Supplement: 42003_2021_1652_MOESM1_ESM.pdf [file 42003_2021_1652_MOESM1_ESM.pdf]

## Supplementary Figure

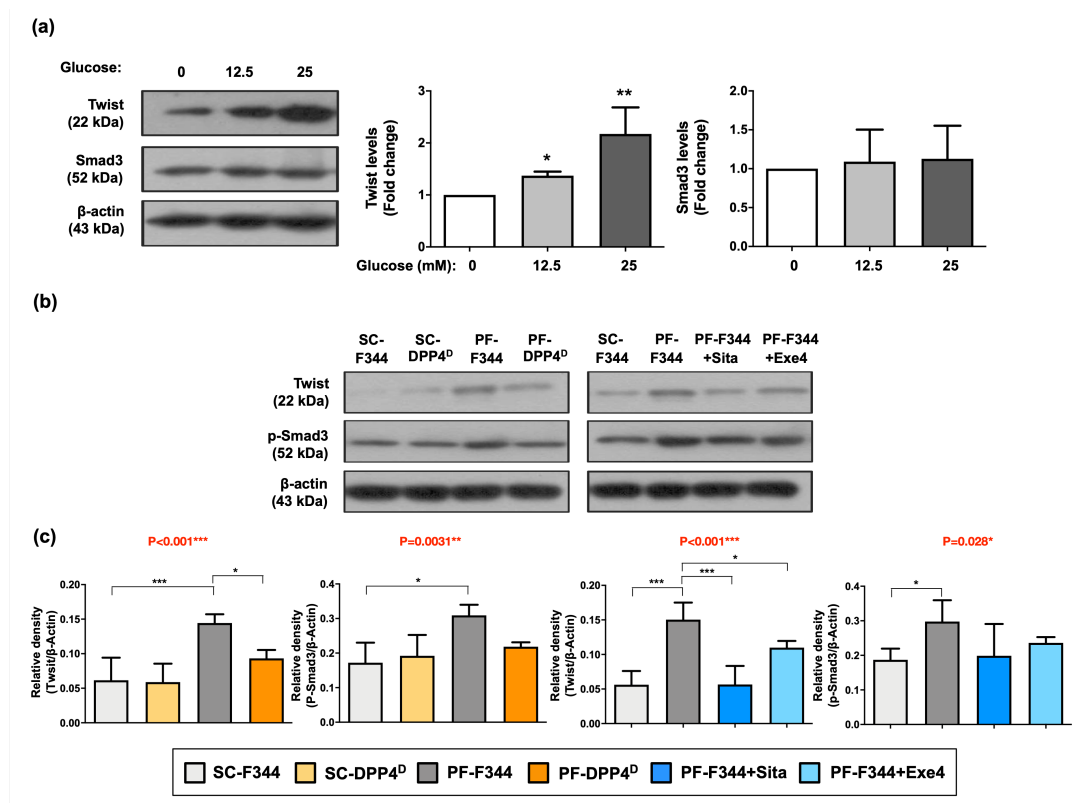

**Supplementary Figure 1. The twist, Smad3 or p-Smad3 protein levels were shown under glucose treatment or in peritoneum against CG-inducing peritoneal fibrosis in rats.** (a) Met-5A cells were exposed in 0, 12.5, and 25 mM D-glucose for 120 hr as well as performed to detect the protein levels of twist and Smad3 by Western blotting. The quantitative results were shown in the right panel. The relative levels were normalized and compared by 0 mM glucose concentration. Data represents the analysis of 3 independent experiments. (b) The experimental model of peritoneal fibrosis (PF) was established by chlorhexidine gluconate (CG) induction for 21 days in wild type (i.e., Fischer 344) and DPP4 deficient (DPP4<sup>D</sup>) rats. Western blotting was performed to detect the protein levels of twist and p-Smad3 in the peritoneal tissues of each group. (c) Quantitative results of Supplementary Fig.1b was shown respectively. n = 6 for each group. Data represents mean  $\pm$  SD; \* indicates p-value < 0.05; \*\* represents p-value < 0.01; and \*\*\* is p-value < 0.001.

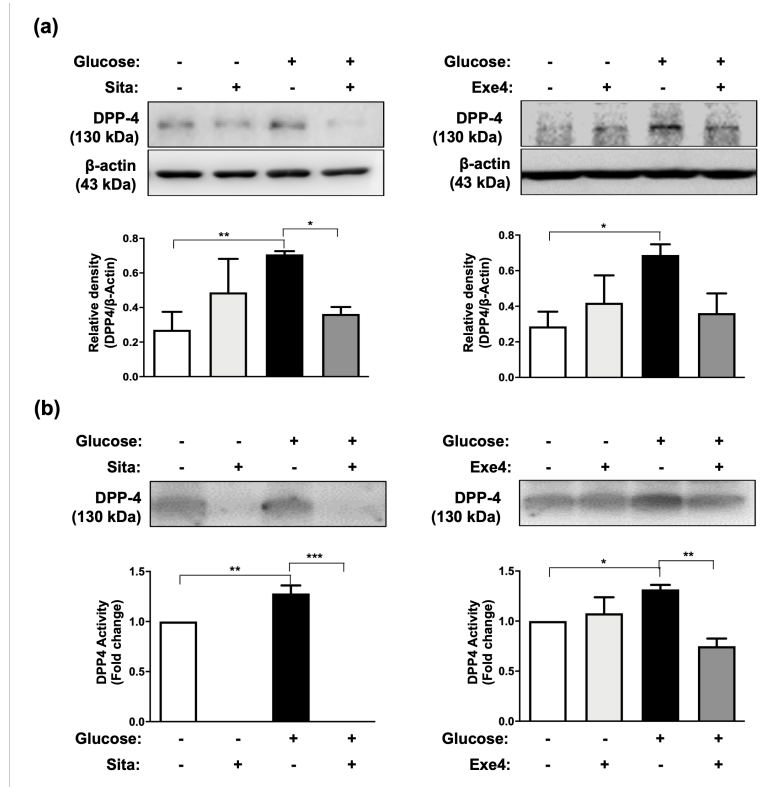

**Supplementary Figure 2. Sitagliptin and exendin-4 repressed the increases of DPP4 protein levels and activities, which were triggered by glucose exposure.** (a) Met-5A cells were incubated with and without 25 mM D-glucose exposure for 120 hr. Under 25 mM D-glucose exposure, Met-5A cells were treated with and without 100  $\mu$ M sitagliptin (Sita) or 100 nM exendin-4. Western blotting was performed to detect the protein levels of cellular DPP4. The quantitative results were shown in the above panel. (b) To examine extracellular DPP4, we collected the supernatant of Met-5A for 5 days glucose exposure. The upper panels indicated the DPP4 protein levels evaluated by Western blot in the supernatant. The lower panel represented DPP4 activities in the supernatant. The relative levels were normalized by 0 mM glucose concentration without drug treatments. Data represents the analysis of 3 independent experiments. Data represents mean  $\pm$  SD; \* indicates p-value < 0.05; \*\* represents p-value < 0.01; and \*\*\* is p-value < 0.001.

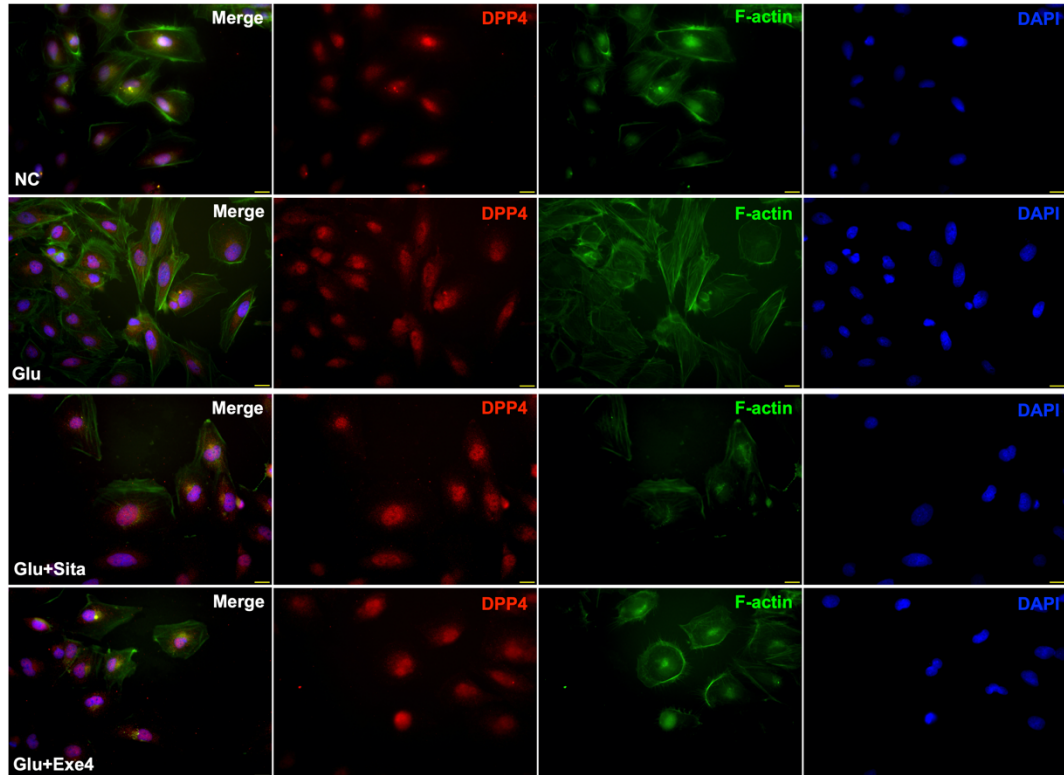

**Supplementary Figure 3. Sitagliptin and exendin-4 suppressed the formation of actin stress fibers triggered by glucose exposure.** Met-5A cells were incubated with and without 25 mM D-glucose exposure (Glu) for 120 hr. Under 25 mM D-glucose exposure, Met-5A cells were treated with 100 μM sitagliptin (Sita) or 100 nM exendin-4 (Exe4). Representative images of immunofluorescence staining were detected in different groups for determining phalloidin-labeled F-actin (green color) and DPP4 signal (red color). DAPI labels cellular nuclei (blue color). Scale bars: 20 μm. The represented images showed the one of results of 3 independent experiments.

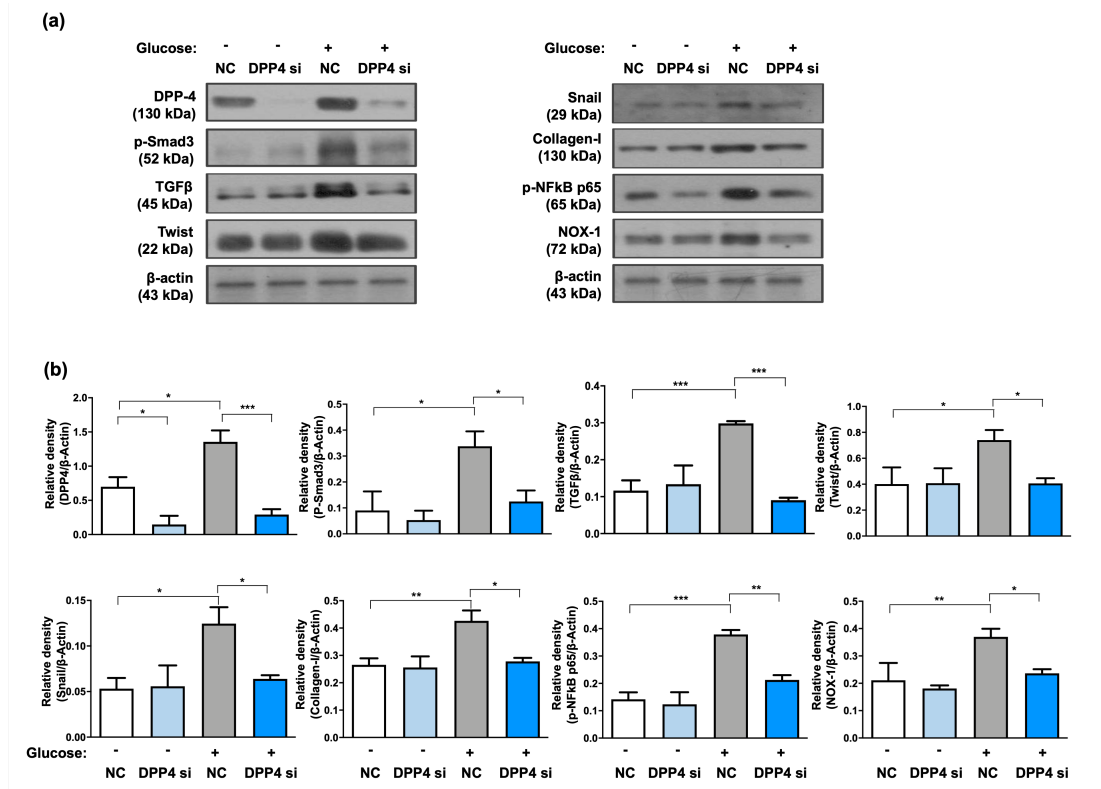

**Supplementary Figure 4. DPP4 siRNA knockdown suppressed glucose-inducing DPP4 expression, EMT process, inflammation and oxidative stress in mesothelial cells.** (a) In the situation with DPP4 siRNA knockdown (DPP4 si) and without knockdown (negative control, NC), Met-5A cells were incubated with and without 25 mM D-glucose exposure for 120 hr to survey the protein expressions. Western blotting was performed to detect the protein levels of DPP4, p-Smad3, TGF-β, twist, snail, collagen-1, p-NF-kB, and NOX-1. (c) Quantitative results of Supplementary Fig.4a was shown respectively. Data represents the analysis of 3 independent experiments. Data represents mean ± SD; \* indicates p-value < 0.05; \*\* represents p-value < 0.01; and \*\*\* is p-value < 0.001.

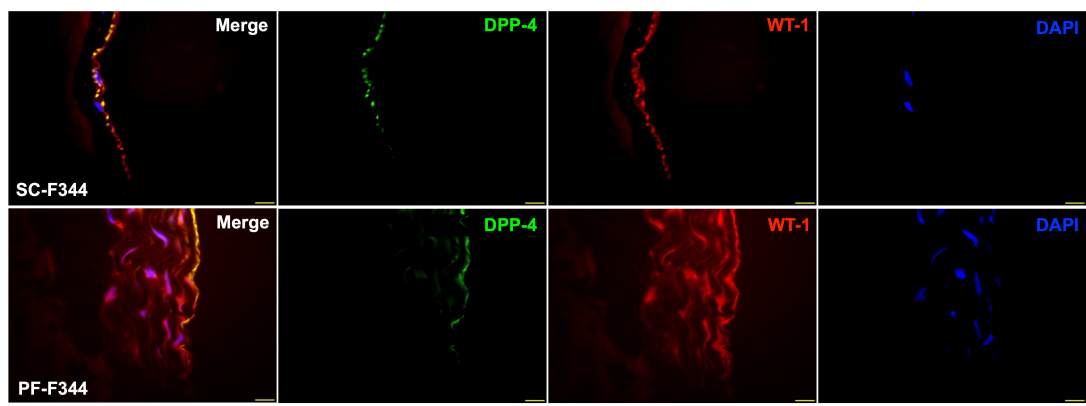

**Supplementary Figure 5. Peritoneal sub-mesothelial region thickened accompanying with DPP4 upregulation in CG-treated animals.** The experimental model of peritoneal fibrosis (PF) was established by chlorhexidine gluconate induction for 21 days in wild type (i.e., Fischer 344) and DPP4 deficient (DPP<sup>D</sup>) rats. Representative images of peritoneal tissue on day 21 were detected by immunofluorescent staining (1000x) in SC-F344 (sham control, F344 wild type) and PF-F344 (peritoneal fibrosis, F344 wild type) rats for determining DPP4 (green color) and WT-1 positive signal (red color). DAPI labels cellular nuclei (blue color). Scale bars: 10  $\mu$ m. The represented images showed the one of results of 3 individual tissues.

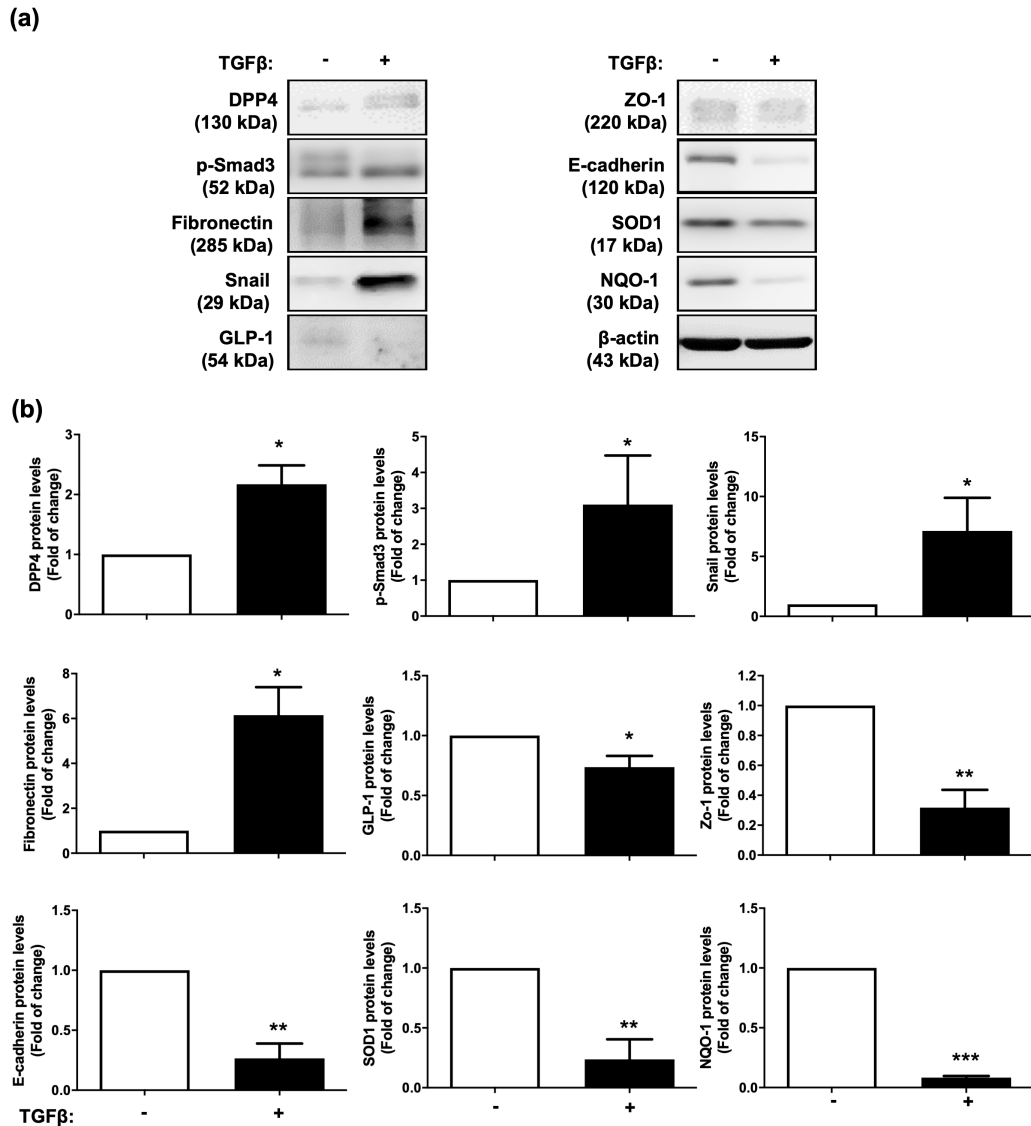

**Supplementary Figure 6. TGF-β triggered the increase of DPP4 levels followed by regulating downstream signaling.** Met-5A cells were incubated with and without 2 ng/mL TGFβ treatment for 120 hr. (a) Western blotting was performed to detect the protein levels of DPP4, p-Smad3, Fibronectin, snail, GLP-1, ZO-1, E-cadherin, SOD-1 and NQO-1 in Met-5A cells. (b) Quantitative results of Supplementary Fig.6a was shown respectively. Data represents the analysis of at least 3 independent experiments. Data represents mean ± SD; \* indicates p-value < 0.05; \*\* represents p-value < 0.01; and \*\*\* is p-value < 0.001.

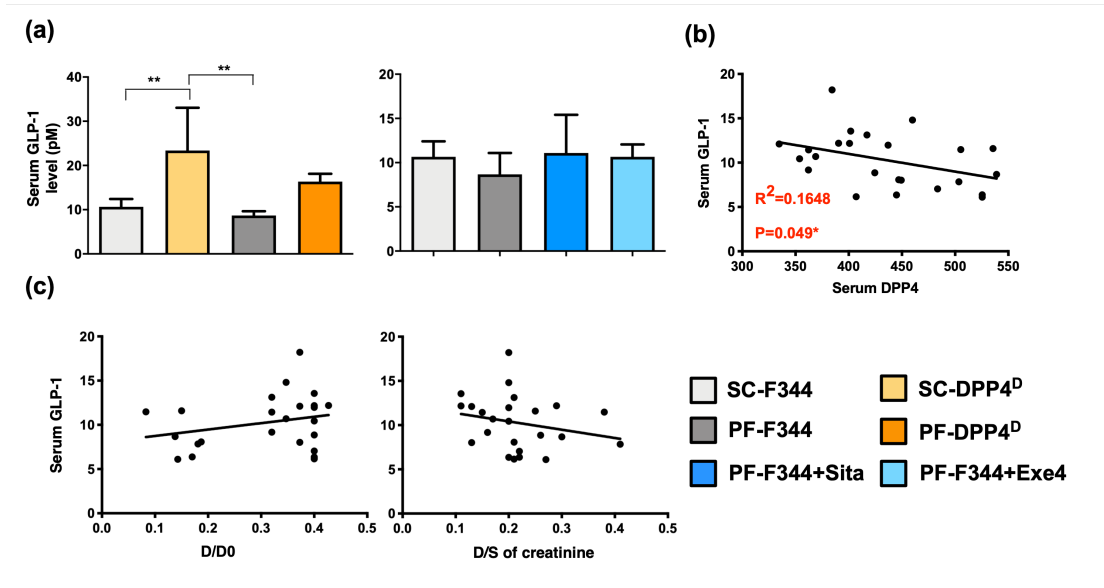

**Supplementary Figure 7. Active GLP-1 levels and the correlations in the circulation of rats.** The experimental model of peritoneal fibrosis (PF) was established by chlorhexidine gluconate (CG) induction for 21 days in wild type (i.e., Fischer 344) and DPP4 deficient (DPP<sup>D</sup>) rats. (a) The left panel showed the quantitative result of active GLP-1 levels in serum of SC-F344, SC-DPP4<sup>D</sup>, PF-F344 and PF-DPP4<sup>D</sup> groups. Additionally, the right panel indicated the quantitative result of active GLP-1 levels in serum of SC-F344, PF-F344, PF-F344+Sita (sitagliptin) and PF-F344+Exe4 (exendin-4) groups. (b) In serum of wild-type rats, the correlation between the active GLP-1 levels and DPP4 activity was evaluated by Pearson correlation coefficients. (c) In serum of wild-type rats, the correlations between the active GLP-1 levels and the parameters of peritoneal transport, including D/D0 and D/S creatinine, were calculated. n = 6 for each group. Data represents mean  $\pm$  SD; \* indicates p-value < 0.05.

**Supplementary 8. The uncropped Western blot images in main and supplementary figures.**



Figure 1b

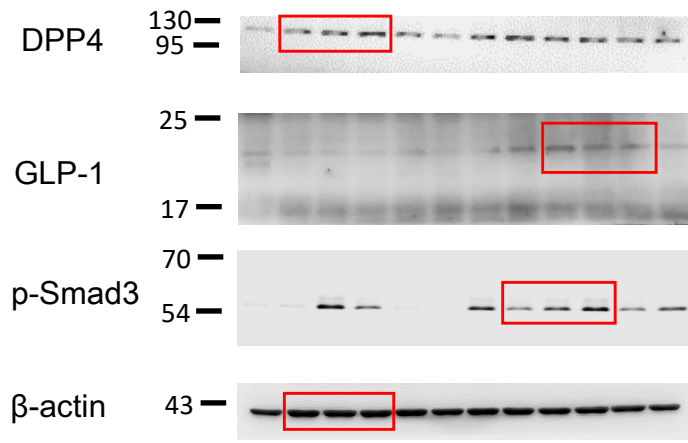

Figure 1c

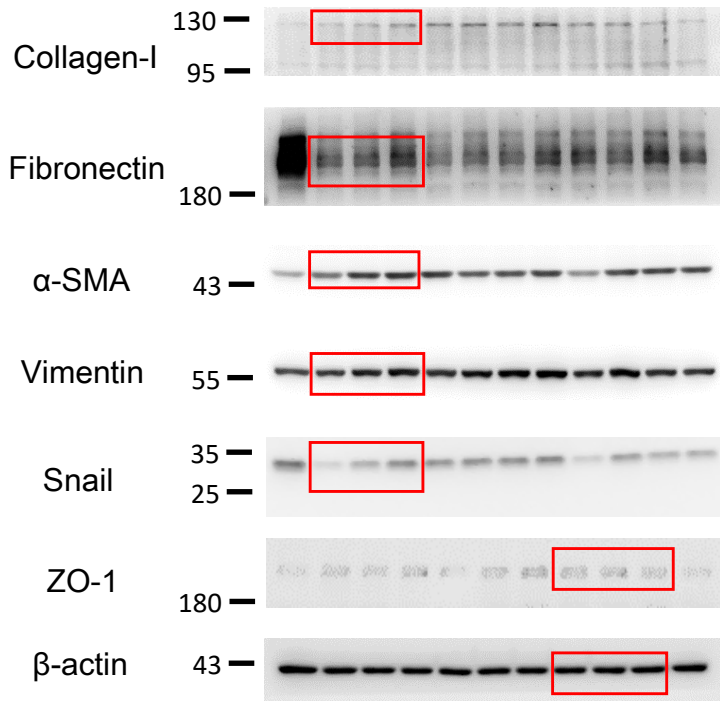

Figure 1d

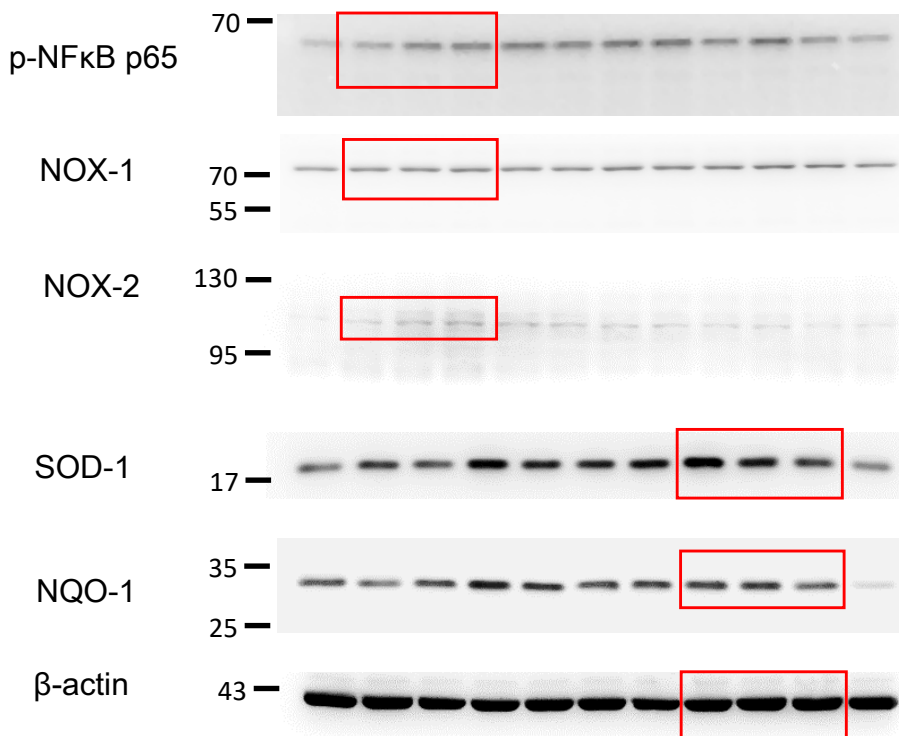

Figure 2b

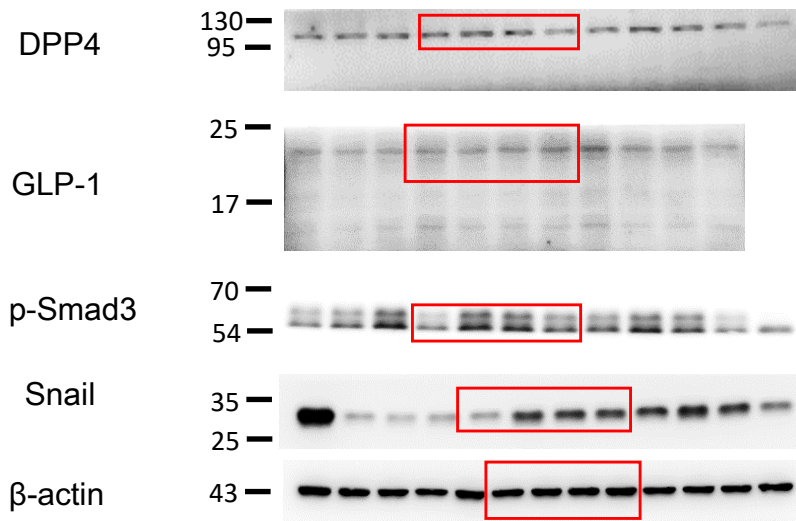

Figure 2c

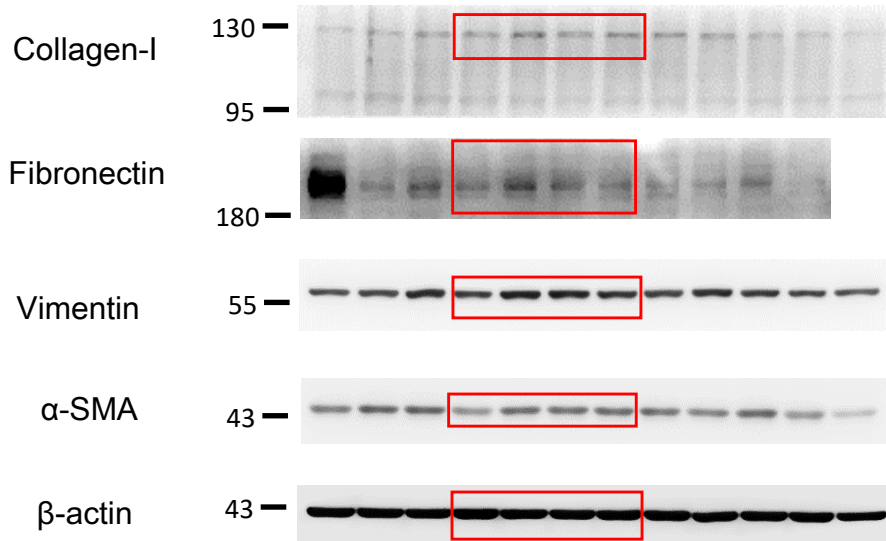

Figure 2d

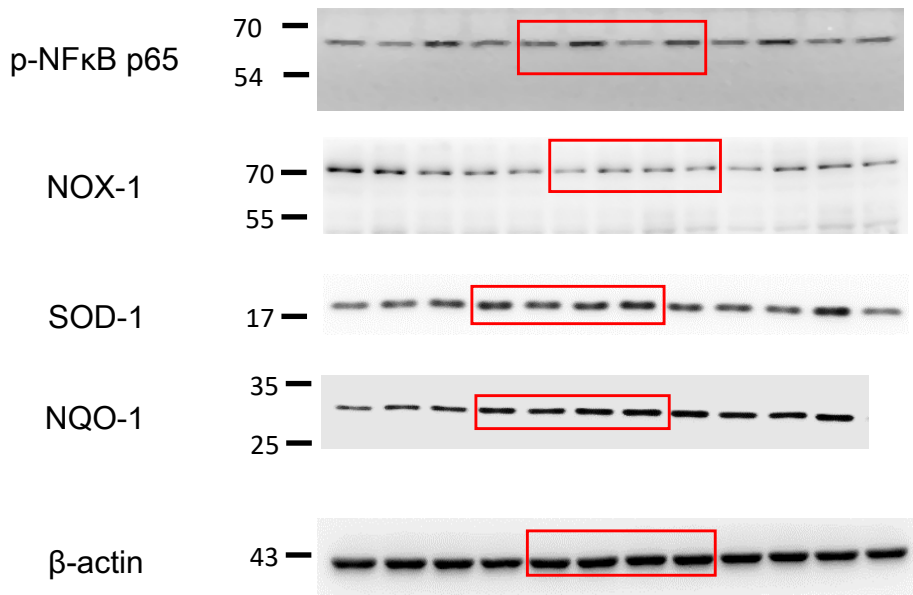

Figure 3b

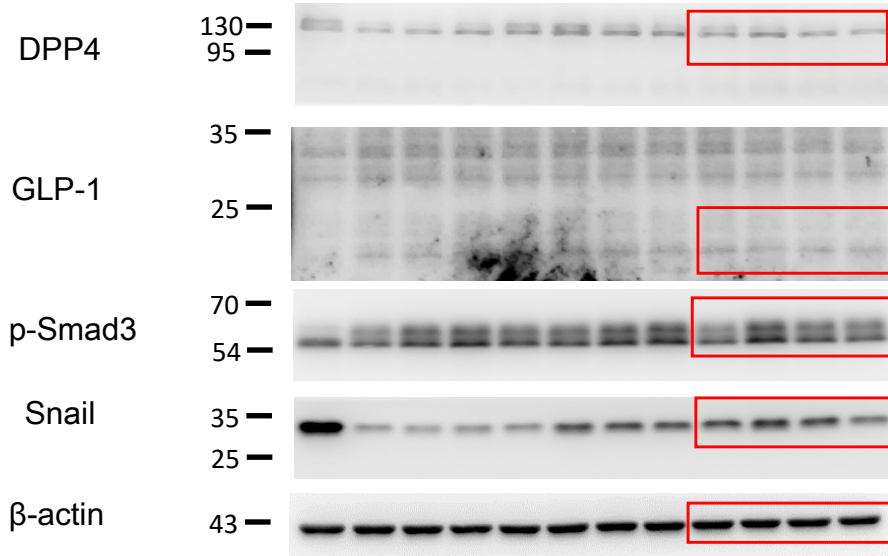

Figure 3c

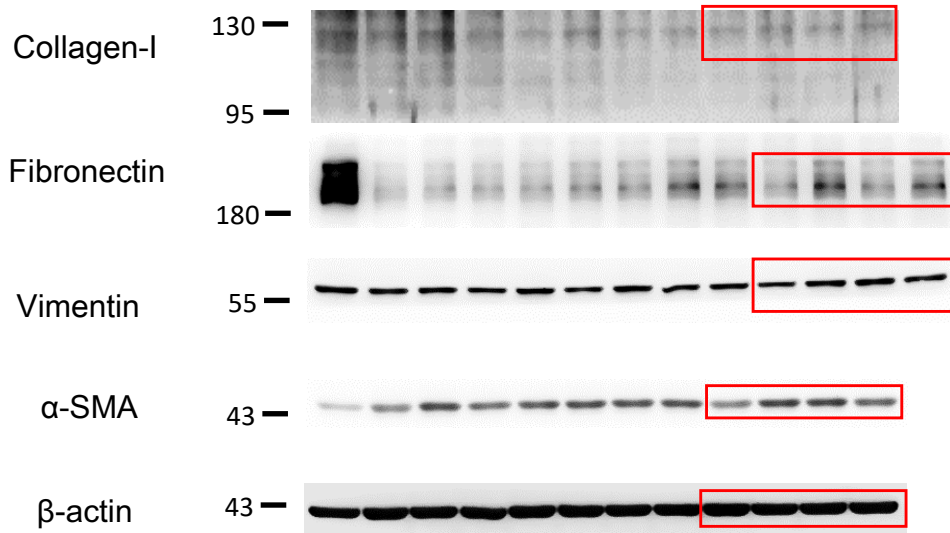

Figure 3d

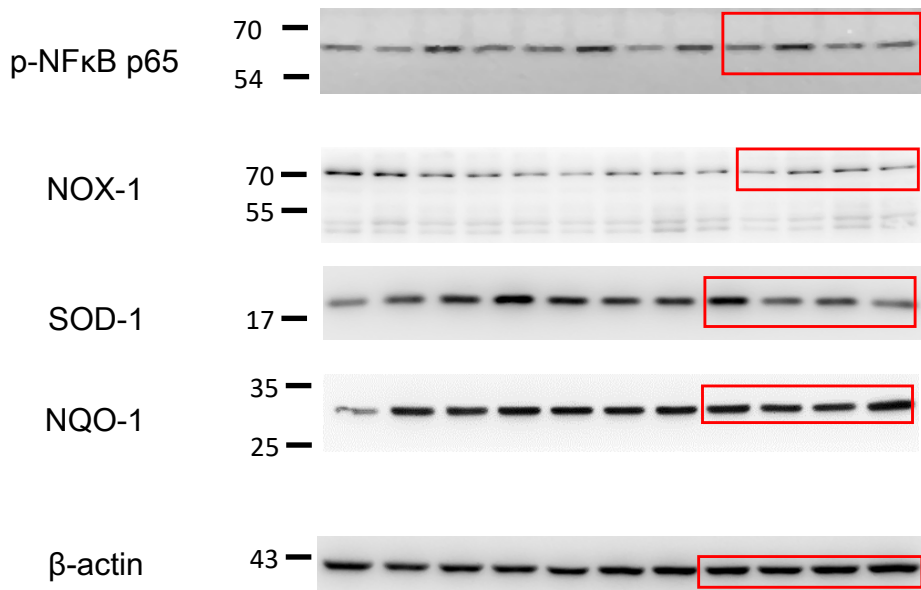

Figure 5d

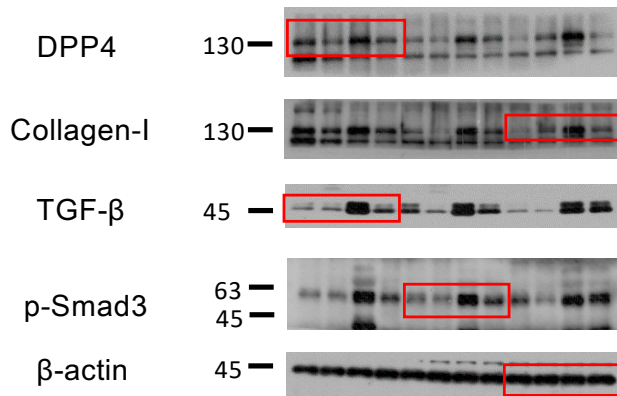

Figure 5e

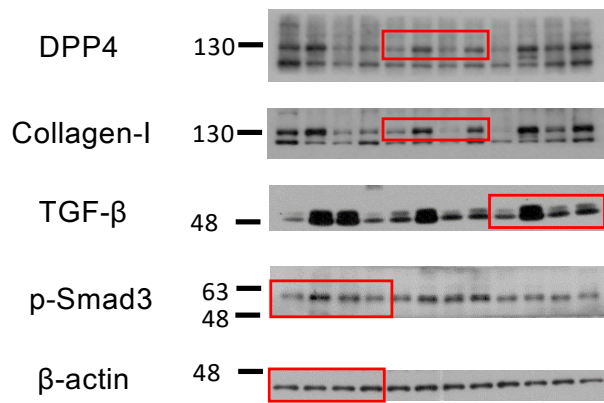

Figure 6g

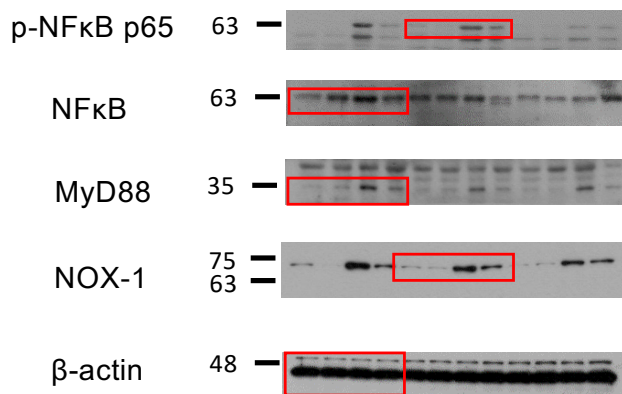

Figure 6h

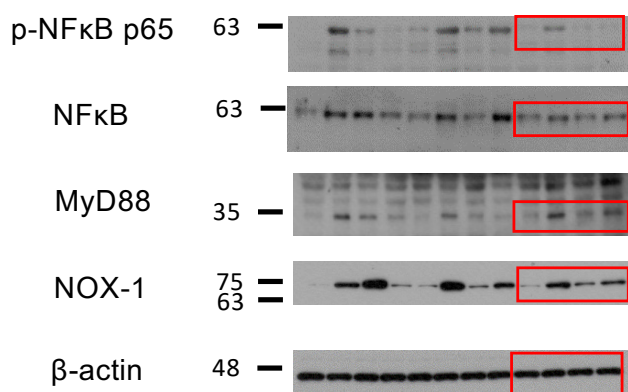

# Supplymentery figure 1a

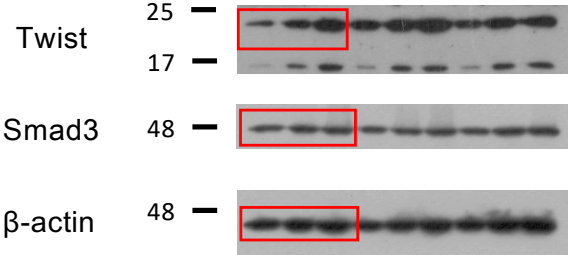

# Supplymentery figure 1b

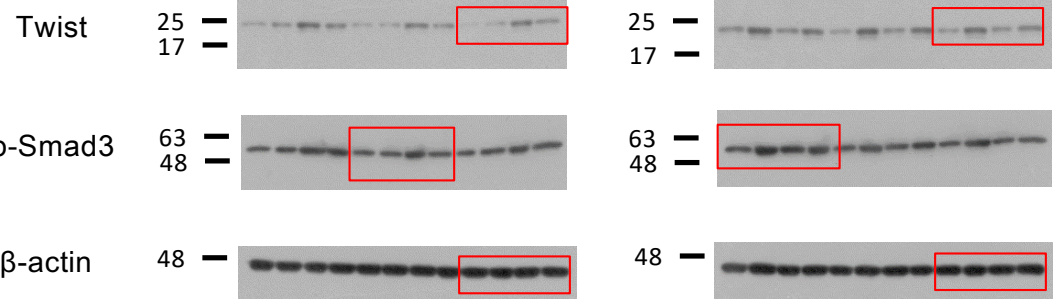

# Supplymentery figure 2a-b

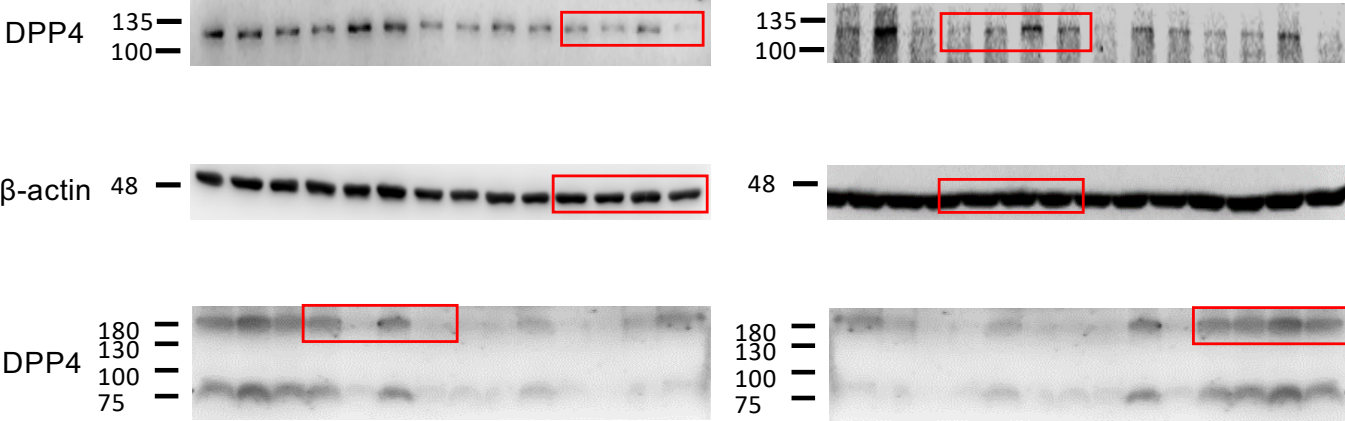

# Supplementary figure 4a

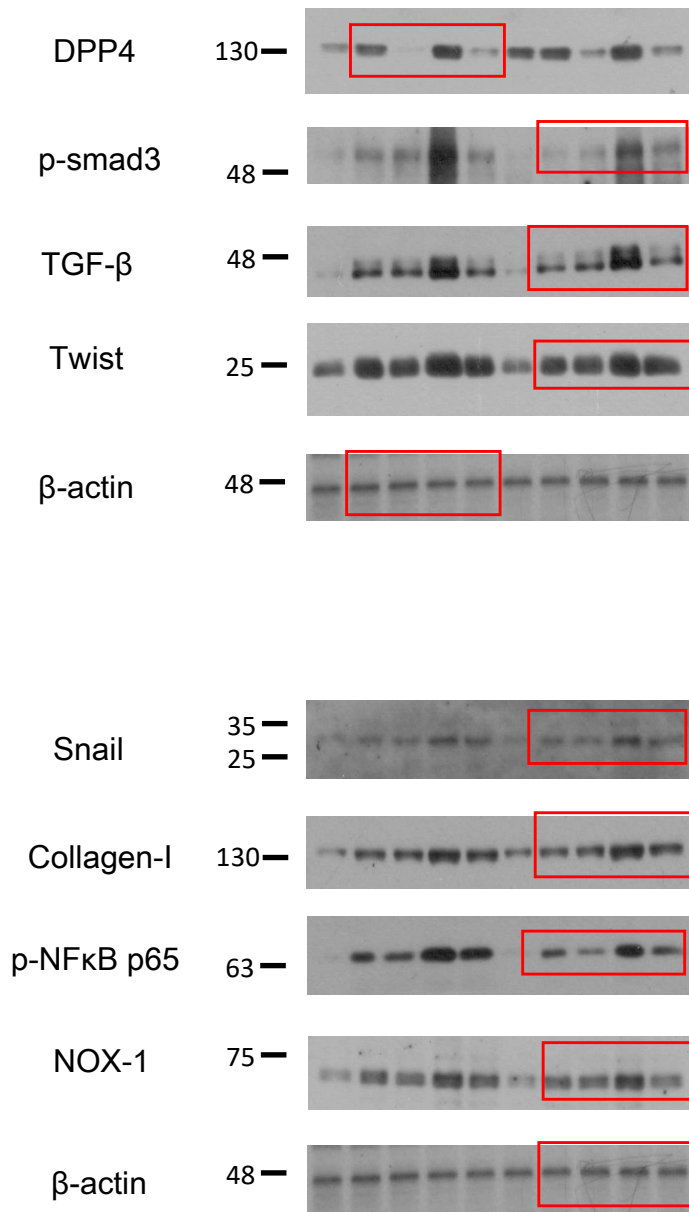

# Supplementary figure 6a

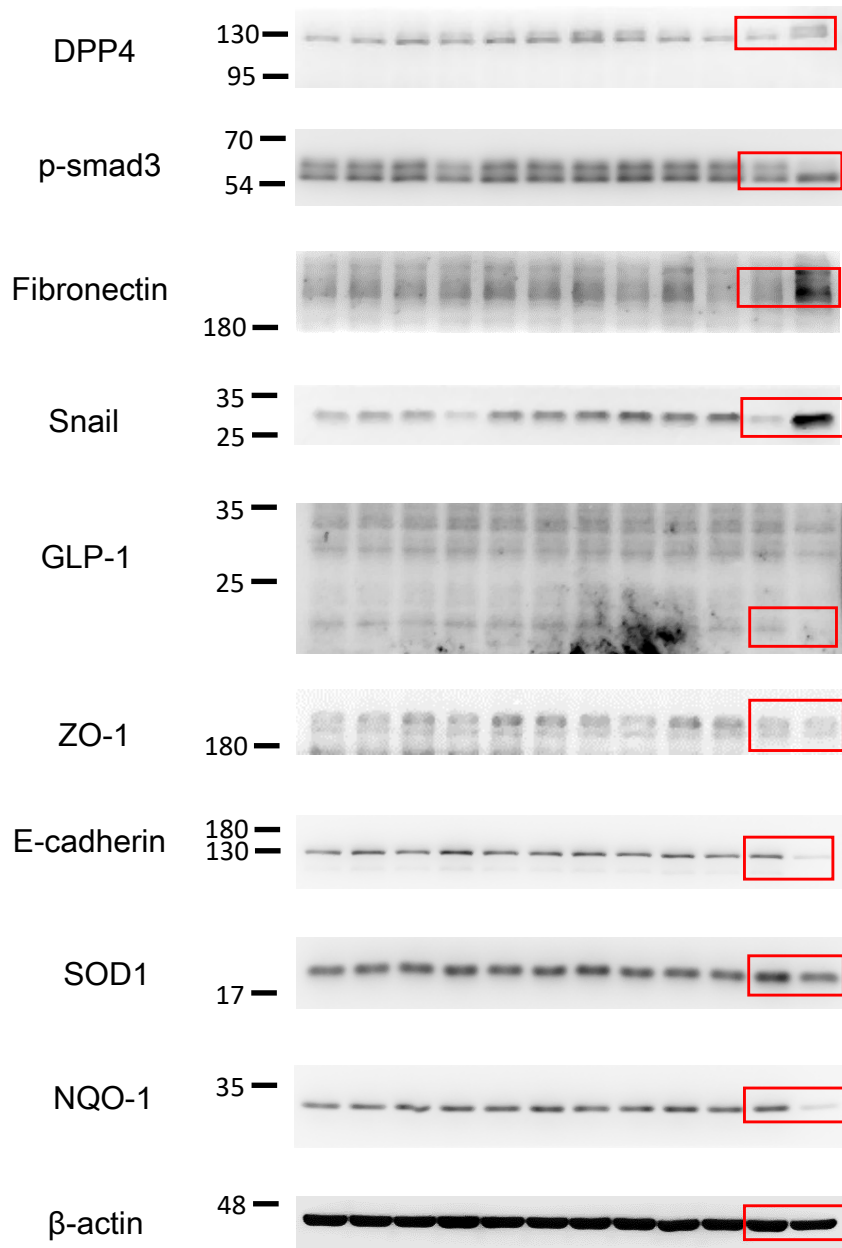

## Supplementary Table

**Supplementary Table 1. Antibody list.**

| Name                                          | Dilute  | Company                  | Cat No.    | Application                                      | Lot No.       |
|-----------------------------------------------|---------|--------------------------|------------|--------------------------------------------------|---------------|
| GLP-1                                         | 1:1000  | Abcam                    | ab22625    | Western blotting                                 | GR3178933-5   |
| p-Smad3                                       | 1:1000  | Abcam                    | ab28379    | Western blotting                                 | GR3194559-4   |
| Smad3                                         | 1:1000  | cell signaling           | #9523      | Western blotting                                 | 7             |
| TGFβ                                          | 1:1000  | Abcam                    | ab64715    | Western blotting                                 | GR3206406-1   |
| collagen type I                               | 1:1000  | Abcam                    | ab34710    | Western blotting                                 | GR3192859-1   |
| Fibronectin                                   | 1:1000  | Abcam                    | Ab6328     | Western blotting                                 | GR3193980-1   |
| α-SMA                                         | 1:1000  | Sigma                    | A2547      | Western blotting                                 | 077M4846V     |
| Vimentin                                      | 1:1000  | cell signaling           | #5741      | Western blotting                                 | 6             |
| Snail                                         | 1:1000  | cell signaling           | #3879      | Western blotting                                 | 12            |
| ZO-1                                          | 1:500   | Abcam                    | ab96594    | Western blotting                                 | GR287296-4    |
| p-NFκB                                        | 1:1000  | cell signaling           | #3033      | Western blotting                                 | 16            |
| NFκB                                          | 1:1000  | Abcam                    | ab16502    | Western blotting                                 | GR3220118-1   |
| MyD88                                         | 1:1000  | Abcam                    | ab2064     | Western blotting                                 | GR3183101-4   |
| NOX1                                          | 1:1000  | Sigma                    | SAB4200097 | Western blotting                                 | 088M4789V     |
| NOX2                                          | 1:1000  | Sigma                    | SAB4200118 | Western blotting                                 | 033M4873      |
| SOD-1                                         | 1:1000  | Abcam                    | ab16831    | Western blotting                                 | GR247287-3    |
| NQO1                                          | 1:1000  | Abcam                    | ab28947    | Western blotting                                 | GR232090-9    |
| Twist                                         | 1:1000  | Abcam                    | Ab49254    | Western blotting                                 | GR3282530-4   |
| Actin                                         | 1:10000 | Merck                    | MAB1501    | Western blotting                                 | 3018859       |
| DPP4                                          | 1:1000  | Aviva Systems<br>Biology | ARP63319   | Western blotting,<br>Immunofluorescence staining | QC34282-40883 |
| DPP4                                          | 1:100   | Thermo                   | MA5-13562  | Immunofluorescence staining                      | TE2572308D    |
| WT-1                                          | 1:1000  | Abcam                    | Ab18.840   | Immunofluorescence staining                      | GR3212808-1   |
| vWF                                           | 1:200   | Merck                    | Ab7356     | Immunofluorescence staining                      | 3139133       |
| Alexa Fluor 488®<br>phalloidin, F-actin probe | 1:400   | Invitrogen™              | A12379     | Immunofluorescence staining                      | 2031929       |
| collagen type I                               | 1:1000  | Abcam                    | Ab34710    | Immunohistochemistry<br>staining                 | GR3192859-1   |
| CD45                                          | 1:100   | Abcam                    | Ab10558    | Immunohistochemistry<br>staining                 | GR108450-1    |



## **Supplementary Methods**

### **DPP4 siRNA transfection and TGF- $\beta$ treatment**

Met-5A cells were transfected with DPP4 siRNA (DPP4 Silencer Select®, Thermo Fisher Scientific) or negative control by Lipofectamine™ 3000 Transfection Reagent (#L3000-015, Invitrogen), followed by starvation and then 25 mM glucose exposure for 120 hr. On the other hand, Met-5A cells were treated 2 ng/ml TGF- $\beta$ 1 recombinant protein (240-B, R&D systems) for 120 hr to elucidate the molecular changes.

### **Immunocytochemistry staining**

Met-5A cells were seeding in Millicell EZ SLIDE (PEZGS0416, Merck). After cells were exposed without glucose and with glucose w/o the inhibiting drugs, cells were fixed and then stained by DPP4 and phalloidin-labeled F-actin antibodies. All the antibody information and conditions were listed in supplementary Table 1 .

### **Assessment of circulating active GLP-1 level**

Glucagon-Like Peptide-1 (Active) ELISA Kit (EGLP-35K, Millipore) was performed to detect active GLP-1 levels in circulation by using standard methods according to manufacturers' instructions.
