# Supplementary material for: Dipeptidyl peptidase 4 promotes peritoneal fibrosis and its inhibitions prevent failure of peritoneal dialysis
Source: PubMed Central journal article supplement (PMC7846859; doi:10.1038/s42003-021-01652-x), 2021-01-29
Supplement: 42003_2021_1652_MOESM2_ESM.pdf [file 42003_2021_1652_MOESM2_ESM.pdf]

## Description of Additional Supplementary Files

**File name:** Supplementary Data 1

**Description:** Source data underlying plots shown in figures.
